# Supplementary material
Source: PubMed Central journal article supplement (PMC2830705)

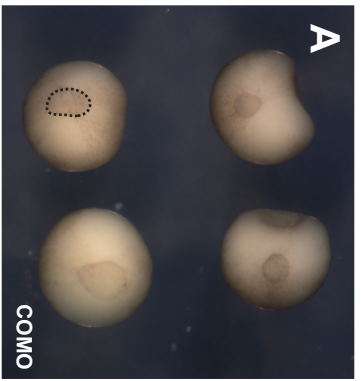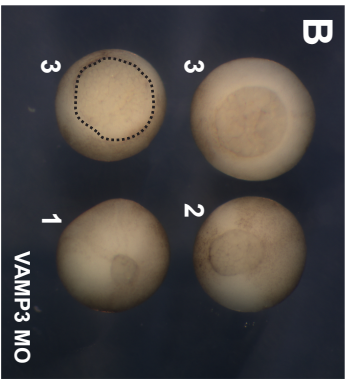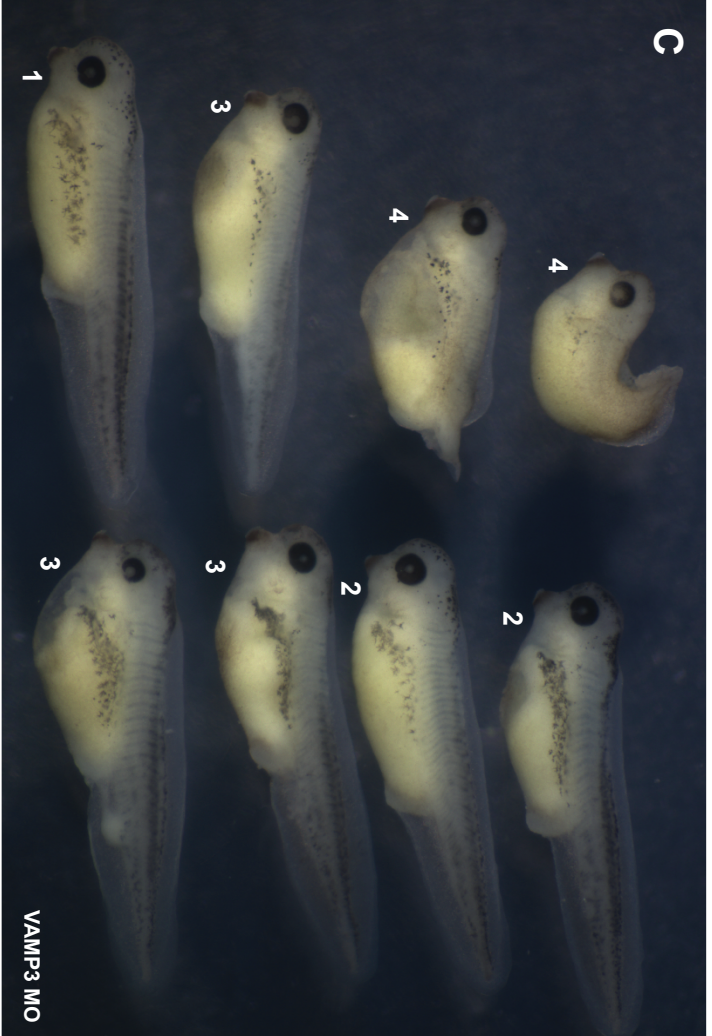

| Blastopore Phenotype | Morphological Characteristics       |
|----------------------|-------------------------------------|
| 1                    | Normal blastopore closure           |
| 2                    | Slightly delayed blastopore closure |
| 3                    | Delayed blastopore closure          |

| Tadpole Phenotype | Morphological Characteristics                                                  |
|-------------------|--------------------------------------------------------------------------------|
| 1                 | Wild-type appearance                                                           |
| 2                 | Slight edema; slightly shorter AP axis                                         |
| 3                 | Severe edema; slightly shorter AP axis                                         |
| 4                 | Severe edema; very short AP axis; underdeveloped posterior region; curved body |

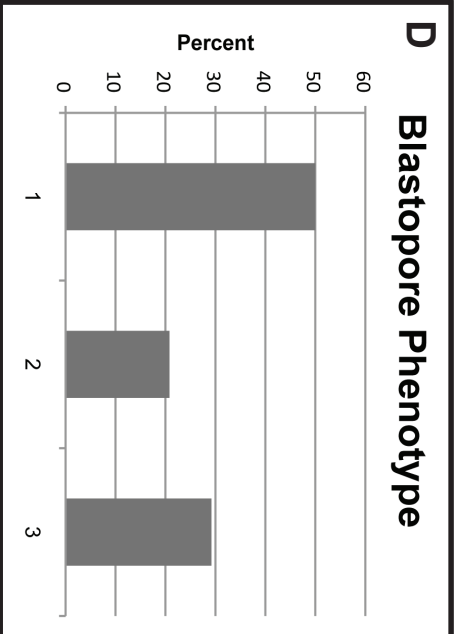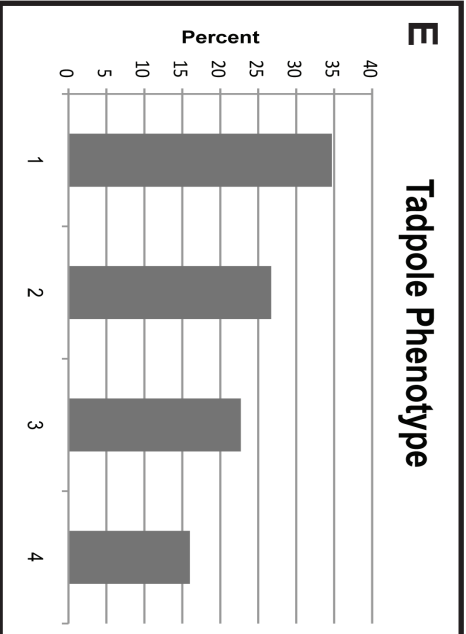

Supplement: emboj2009379s12.pdf [file emboj2009379s12.pdf]
