# Supplementary material
Source: PubMed Central journal article supplement (PMC2830705)

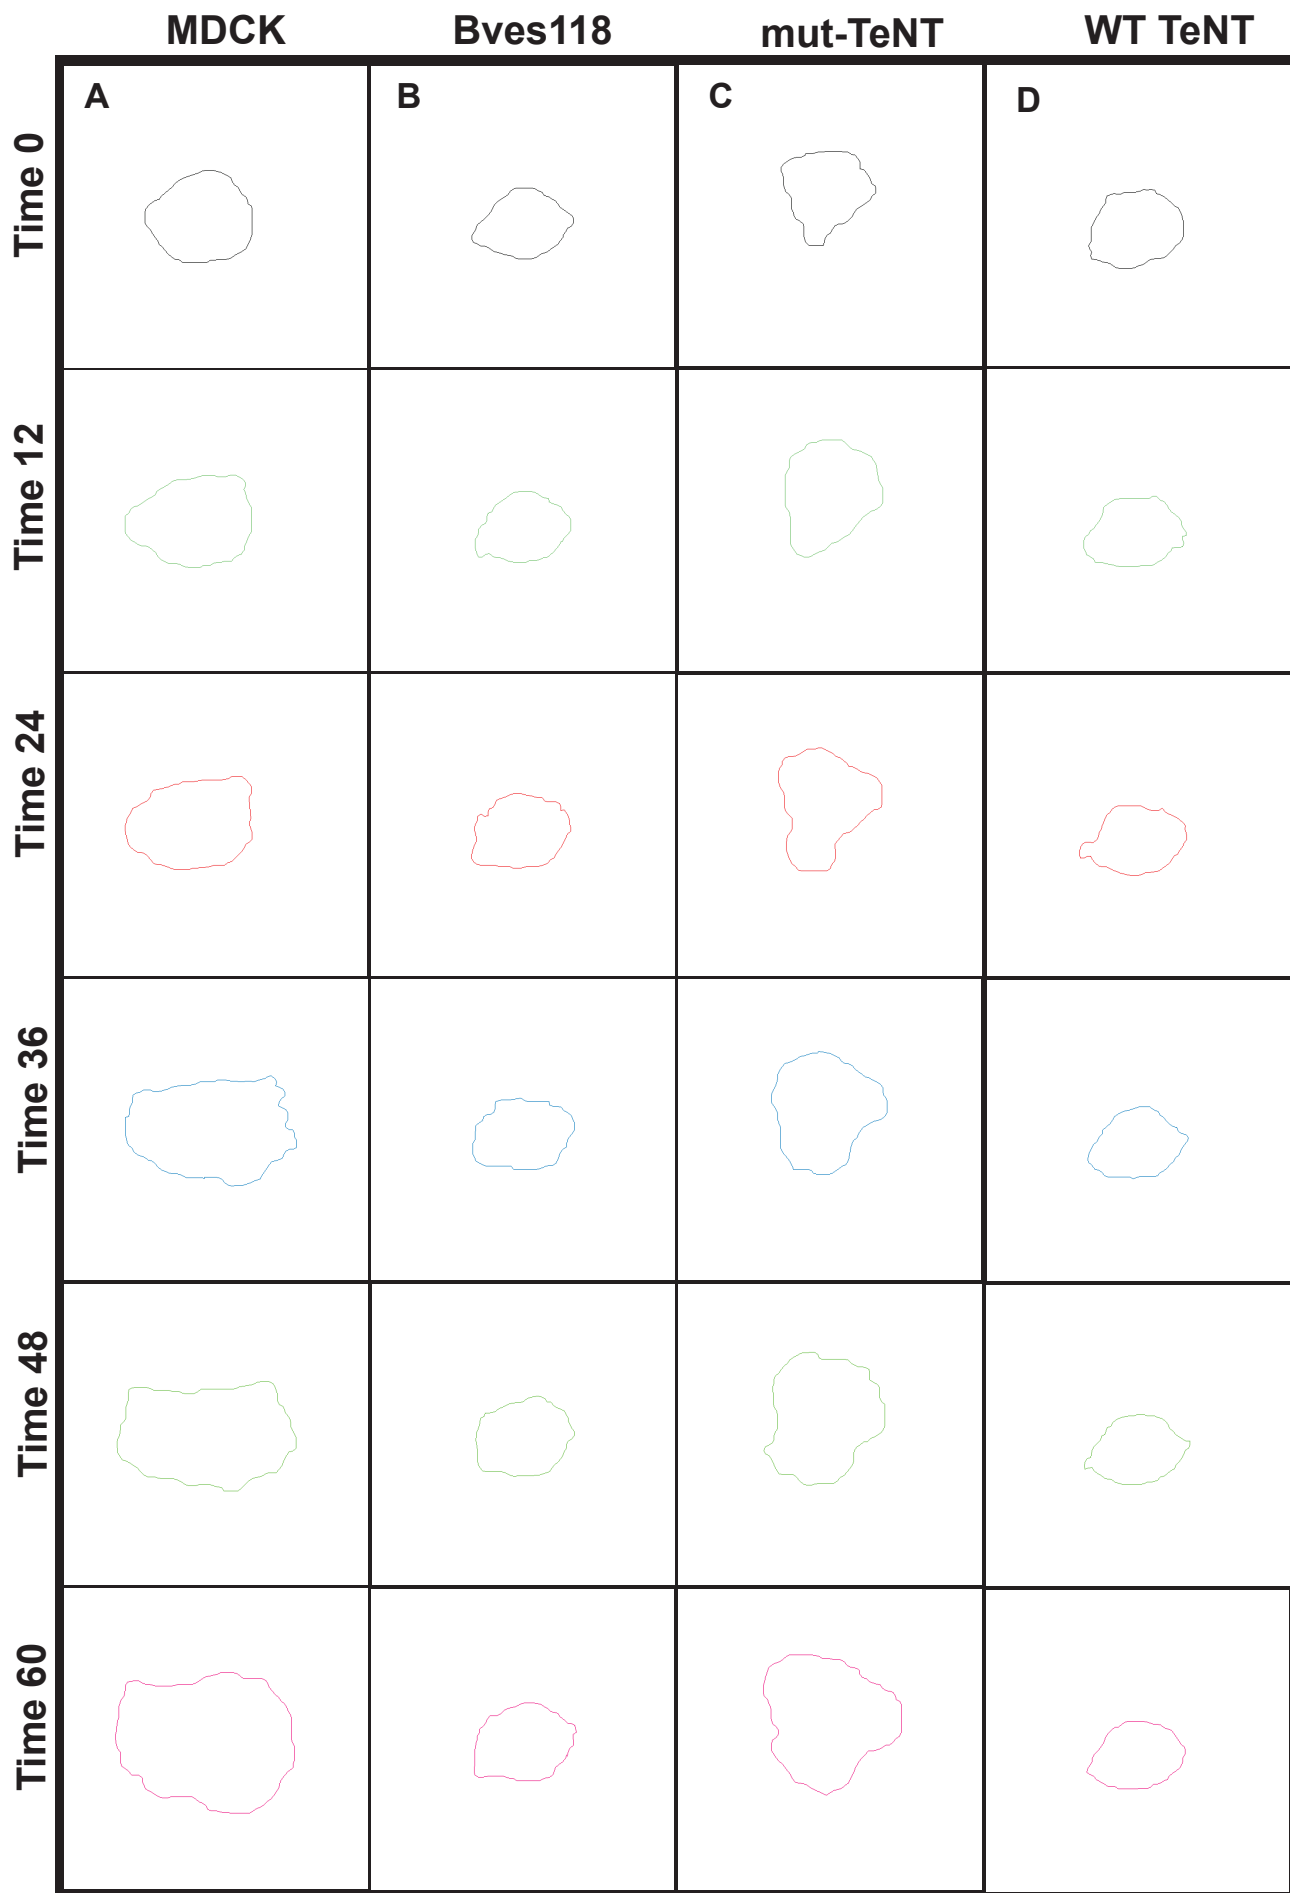

Supplement: emboj2009379s11.pdf [file emboj2009379s11.pdf]

**A**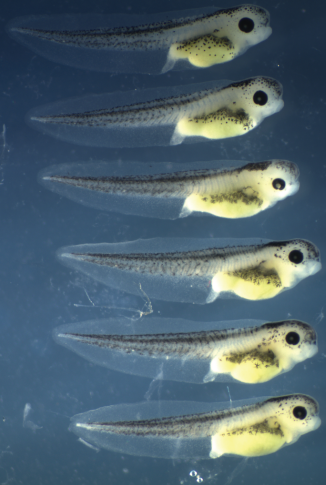**B**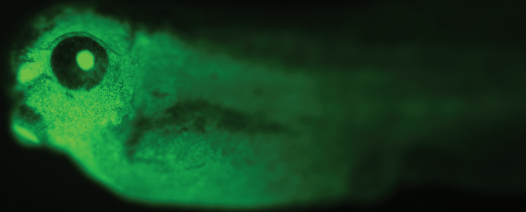**mGFP**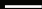

Supplement: emboj2009379s13.pdf [file emboj2009379s13.pdf]

**COMO****Bves MO****VAMP3 MO**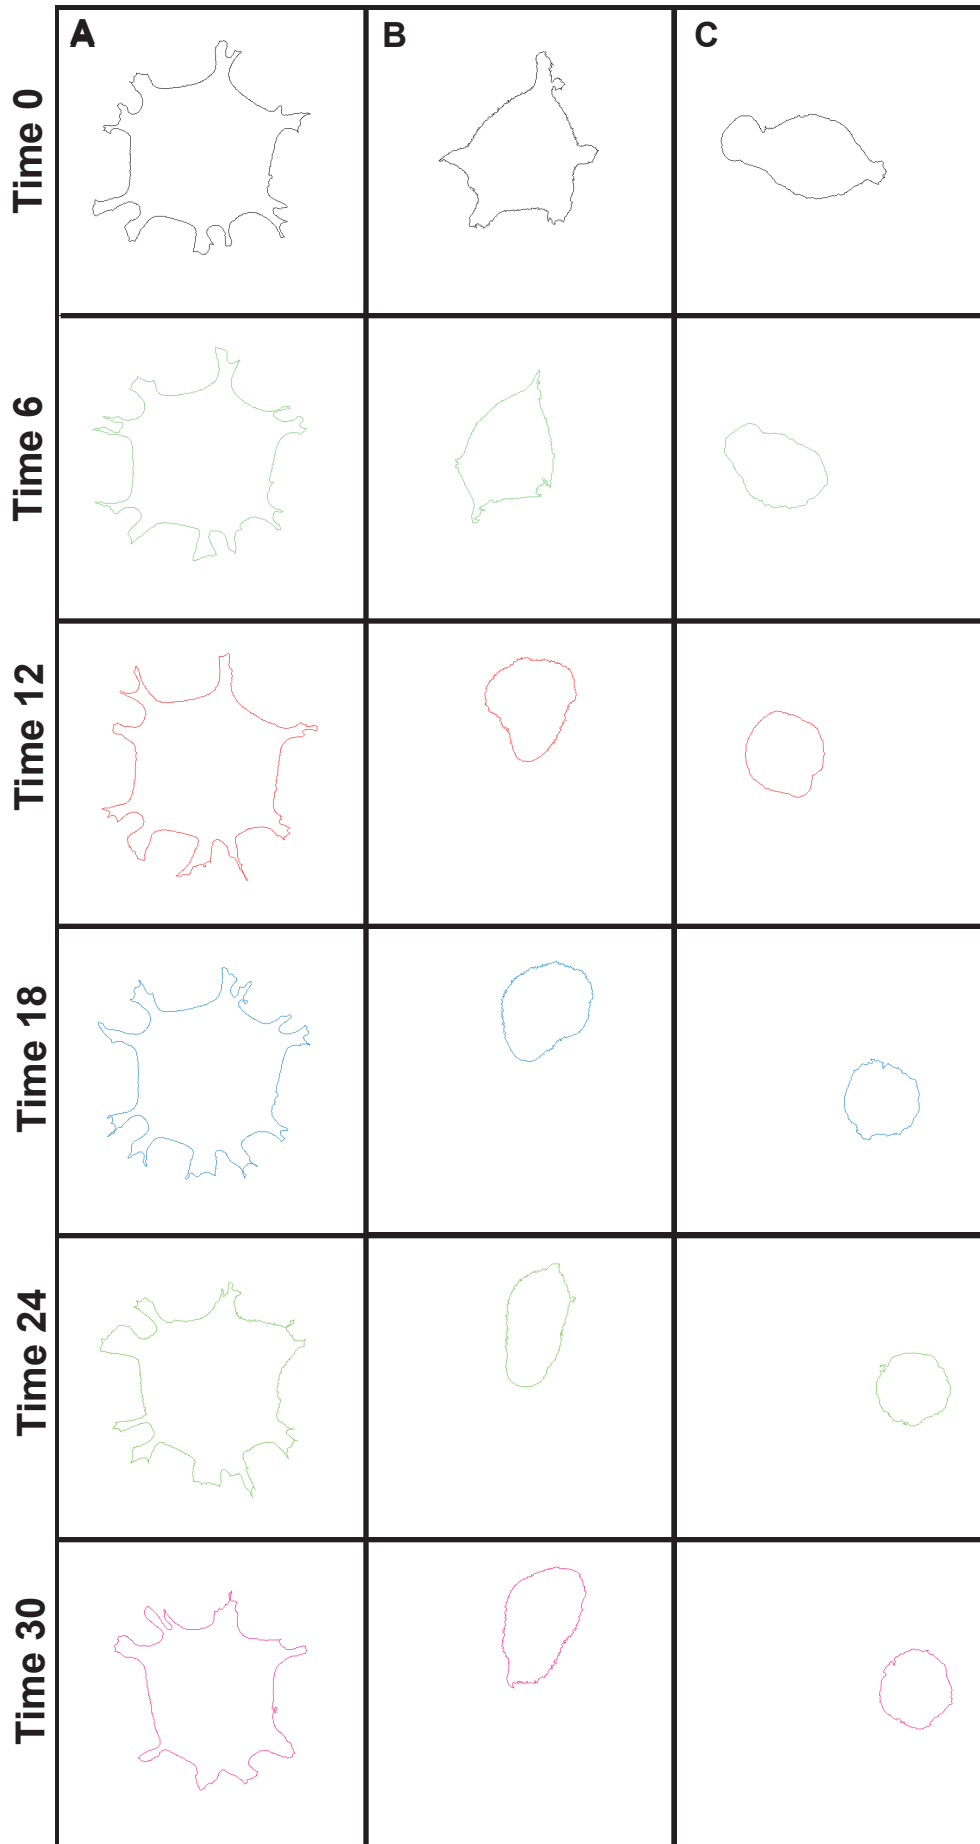

Supplement: emboj2009379s18.pdf [file emboj2009379s18.pdf]
